# Supplementary material for: Increased Presence of Complement Factors and Mast Cells in Alveolar Bone and Tooth Resorption
Source: MDPI journal article supplement (doi:10.3390/ijms22052759), 2021-03-09
Supplement: s1 [file s1]

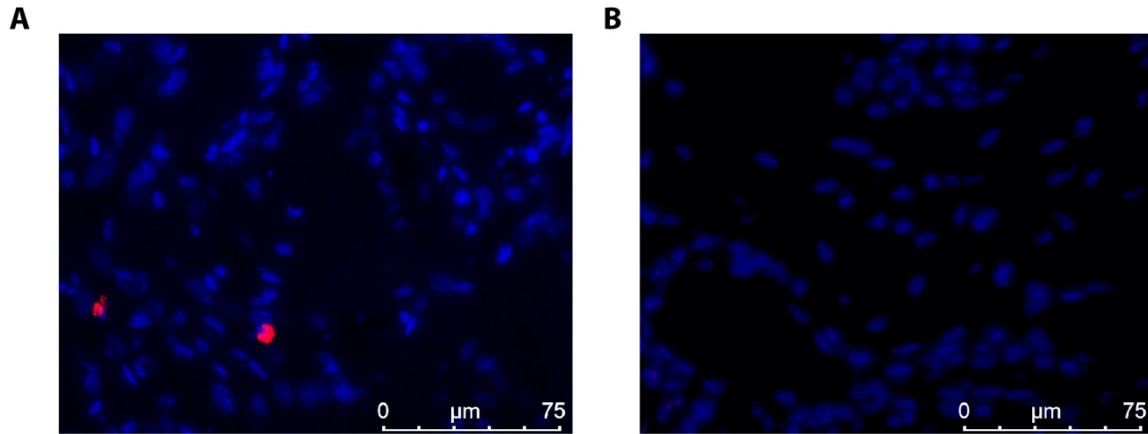

**Supplemental Figure S1.** Establishment of specific mast cell staining by Avidin-Texas Red conjugate. **(A)** Femur section from a wildtype mast cell competent mouse. Mast cells in the bone marrow are stained with Avidin-Texas Red conjugate. **(B)** Femur section from a  $Mcpt5-Cre^+ R-DTA^{flx/flx}$  mast cell deficient mouse. No cells are stained by Avidin-Texas Red conjugate.
